# Supplementary material for: Evaluation of Durability of Transparent Graphene Electrodes Fabricated on Different Flexible Substrates for Chronic in vivo Experiments
Source: PubMed Central journal article supplement (PMC8560430; doi:10.1109/tbme.2020.2979475), 2020-03-17
Supplement: NIHMS1639106-supplement-supp1-2979475.pdf [file NIHMS1639106-supplement-supp1-2979475.pdf]

# Supplementary Information

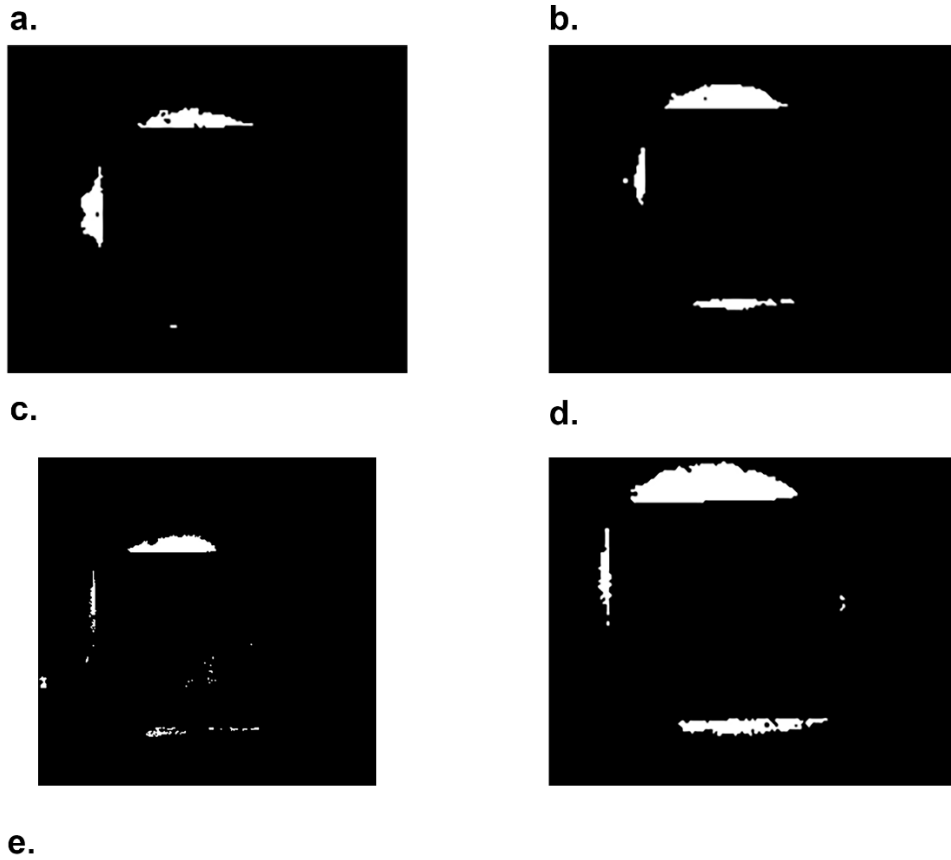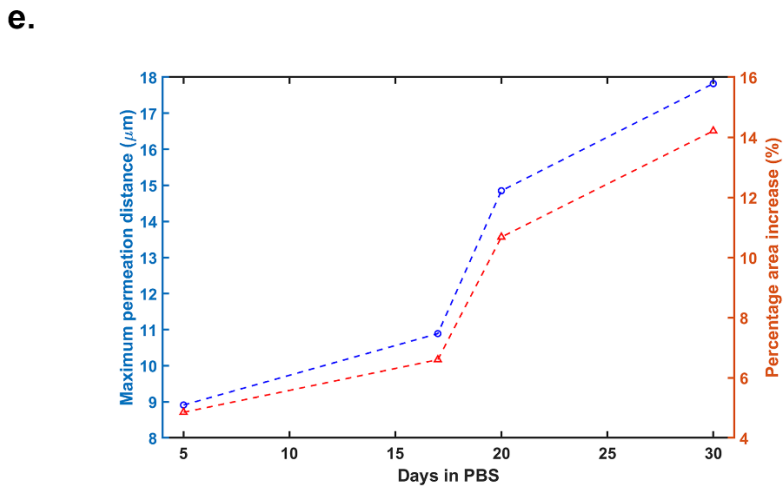

**Supplementary Figure S1:** Grey scaled images of microelectrode arrays fabricated on PET substrate over 30 days in solution, distinguishing PBS permeation around the electrode. (a) Day 5. (b) Day 17. (c) Day 20. (d) Day 30. (e) Maximum permeation distance and percentage area increase of the electrode as a function of days immersed in PBS solution.

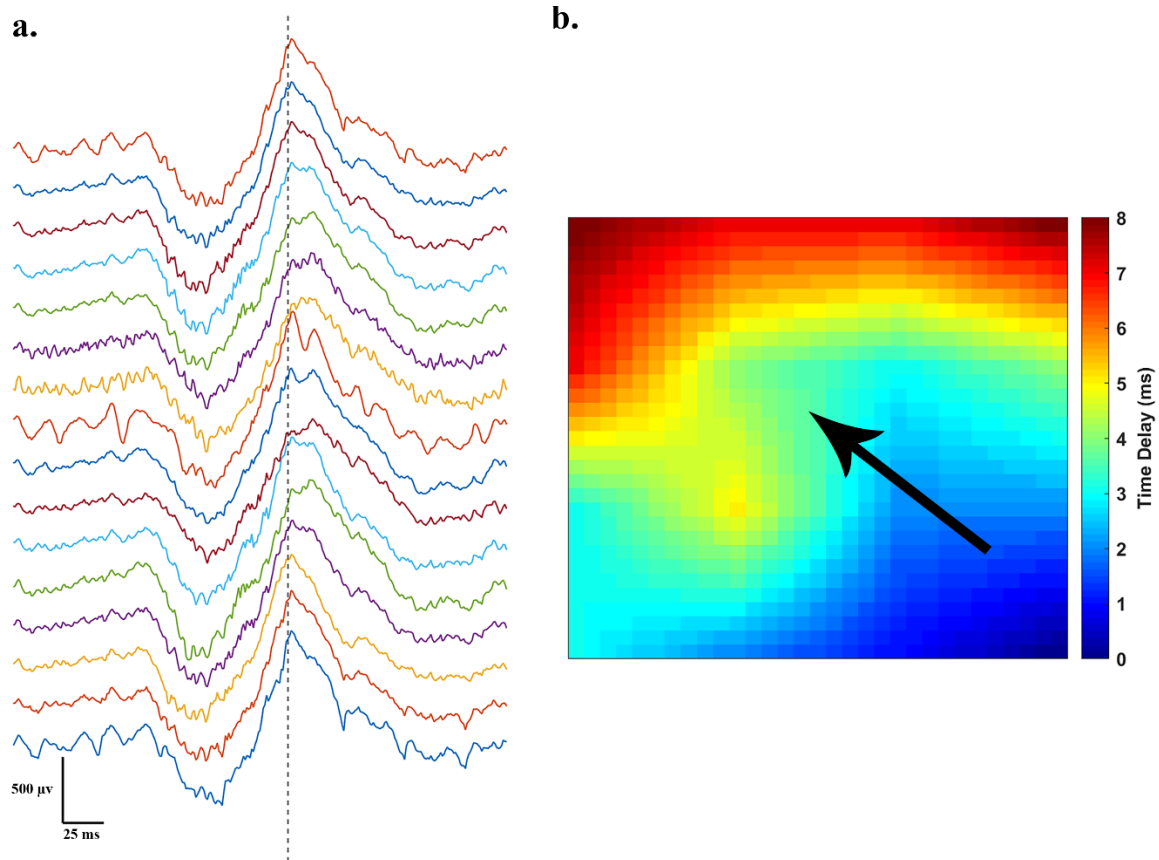

**Supplementary Figure S2:** (a) Representative multi-channel ECoG recordings demonstrating a time delay of spontaneous local-field potentials (LFPs) from different channels. (b) Time latency of the peak marked by the dashed line in panel (a). The black arrow indicates the direction of LFP propagation.

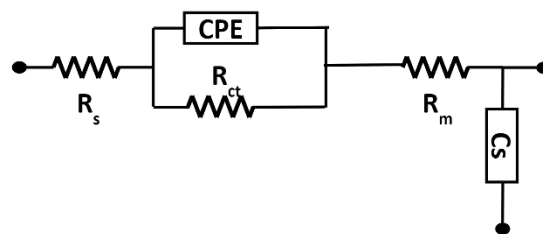

**Supplementary Figure S3:**  $R_s$  is the solution resistance. CPE is the constant phase element representing the double-layer capacitance, and  $R_{ct}$  represents the charge transfer resistance.  $R_m$  represents the resistance from the metal wires.  $C_s$  is the capacitance, which represents capacitive impedance across wires and channels [1].

**Supplementary Table S1: Thermal and mechanical properties of soft polymer materials**

| Properties            | Thermal Expansion Coefficient (ppm/°C) | Fracture Strain (%) | Young's Modulus (GPa) | Tensile Strength (Mpa) |
|-----------------------|----------------------------------------|---------------------|-----------------------|------------------------|
| <b>PET [2]</b>        | 20-80                                  | 60-165              | 2.0-2.7               | 55                     |
| <b>SU-8 2000 [3]</b>  | 52                                     | 6.5                 | 2.0                   | 60                     |
| <b>Parylene-C [4]</b> | 35                                     | 200                 | 2.8                   | 69                     |
| <b>Polyimide [5]</b>  | 52                                     | 19.1                | 2.5                   | 231                    |

**Supplementary Note 1. Equations for equivalent circuit models**

Constant phase element:

$$Z_{CPE} = \frac{1}{(j\omega)^A C_{dl}}$$

Bounded Warburg element:

$$Z_{WB} = \frac{W_B}{\sqrt{j\omega}} \tanh\left(\frac{\sqrt{j\omega}}{B}\right)$$

References:

- [1] D. A. Robinson, "The electrical properties of metal microelectrodes," *Proceedings of the IEEE*, vol. 56, no. 6, pp. 1065-1071, 1968.
- [2] "Polyethylene terephthalate Material Information." <http://www.goodfellow.com/E/Polyethylene-terephthalate.html> (accessed.
- [3] "SU-8 Permanent Photoresists," ed.
- [4] "Parylene Properties," ed.
- [5] "Material Property Database," ed.
